# Supplementary material for: Single-Step Thermo-Mechano-Chemical Approach for Advance Magnet Manufacturing
Source: Research Square preprint supplement (doi:10.21203/rs.3.rs-5545269/v1), 2024-12-12
Supplement: Supplementary file 1 [file 074eb96dca17c6852d6283d0.docx]

**Single-Step Thermo-Mechano-Chemical Approach for Advance Magnet Manufacturing**

Aniruddha Malakar1, Andrew Martin1, Farhan Ishrak1, Anqi Yu2, Mayur Pole2, Jens Darsell2, Tianhao Wang2, Joseph Helsing3, John Thornton4, Michael Lastovich1, Libor Kovarik2, Glenn Grant2, Joseph Tracy1, Martin Thuo1, Mert Efe2, Bharat Gwalani1

1Department of Materials Science and Engineering, North Carolina State University, Raleigh, NC, 27695-7907, USA

2Pacific Northwest National Laboratory, 902 Battelle Blvd, Richland, WA, 99352, USA

3 Department of Electrical and Computer Engineering, Stevens Institute of Technology, Hoboken, NJ 07030

4 Bruker Nano Surfaces & Metrology, AFM Unit, Santa Barbara, CA, USA

#Corresponding authors: [mert.efe@pnnl.gov](mailto:mert.efe@pnnl.gov); [bgwalani@ncsu.edu](mailto:bgwalani@ncsu.edu)

**Supplementary information**





*Figure -S1: (a) Schematic of the FSC setup, (b) BSE image of the initial Sm-Co powder particles containing SmCo5 and Sm2Co7 phases, (c) the final consolidated bulk Sm-Co magnet and (d) the powder container that was used during the consolidation process.*

A Shear Assisted Processing and Extrusion (ShAPE) machine manufactured by BOND Technologies, Inc. was employed to perform the Friction Stir Consolidation (FSC) of the powder mixture. The schematic of the FSC set up is shown in Fig. S1. The consolidation process utilized a Co-based MP159 superalloy tool with an outer diameter of 25.4 mm and an H13 tool steel container with an inner diameter of 26.0 mm. During the process, the rotating tool (at 300 rpm) advanced towards the container holding the initial powders and exerted a pressure 4536 Kg on the powder particles for 120 Sec.





*Figure-S2: FEM-based model demonstrates the superior efficiency of FSC in reducing porosity compared to conventional pressing.*





*Figure-S3: EDS point analysis at different locations of fully consolidated region; (a) The BSE image, EDS spectra of (b) SmCo5, (c) Sm2Co7, (d) Sm oxide, and (e) SmCo(5-x) (x<1) phases. Note: the presence of SmCo(5-x) phases was restricted around the phase interfaces.*





Figure-S4: Selected area electron diffraction (SAED) patterns for (a) SmCo5, (b)Sm2
O3, and (c) Sm2Co7 phases and (d) high-resolution TEM image of the faulted Sm2Co7 phase.





*Figure -S5: (a) Image quality map of fully consolidated region obtained from EBSD scan revealing bimodal grain size distribution and the presence of ultrafine and coarse grains. The magnified image of the highlighted region in (a) shows (b) an example of grain fragmentation and (c) nucleation of new grains.*





*Figure -S6: (a) TGA-DSC and (b) weight gain curve of fully and partially consolidated region, (c) SEM image of post heat-treatment sample. (d-g) EDS analysis of the sample after DSC experiment.*
